# Supplementary material
Source: Royal Society of Chemistry journal article supplement (doi:10.1039/d6nj00491a)
Supplement: d6nj00491a1.pdf [file d6nj00491a1.pdf]

## Supplementary Material

### **Dual-activator strategy to facilely tune pore structure of lignin-based porous carbon for high performance supercapacitors**

Xiaofeng Liang<sup>a</sup>, Yue Yang<sup>b</sup>, Hongtao Guo<sup>a</sup>, Yichao Ye<sup>a</sup>, Tao Yin<sup>a\*</sup>, Zhipeng Tian<sup>a</sup>, Chao Wang<sup>a</sup>,

Jingtao Zhang<sup>a</sup>, Riyang Shu<sup>a\*</sup>

<sup>a</sup> *Guangdong Provincial Key Laboratory of Functional Soft Condensed Matter, School of Materials and Energy, Guangdong University of Technology, Guangzhou 510006, PR China*

<sup>b</sup> *Dezhou Eco-environment Monitoring Center of Shandong Province, Dezhou 253000, PR China*

\*Corresponding author: Tao Yin; Riyang Shu

E-mail address: yintao@gdut.edu.cn; shuriyang@gdut.edu.cn

**Table S1** The solution resistance and charge transfer resistance of the porous carbons.

| Samples  | Rs ( $\Omega$ ) | Rct ( $\Omega$ ) |
|----------|-----------------|------------------|
| CFe      | 1.176           | 0.22             |
| CFeK-1.5 | 1.254           | 0.24             |
| CFeK-1   | 1.268           | 0.24             |
| CFeK-0.5 | 1.339           | 0.25             |
| CK       | 1.665           | 0.29             |

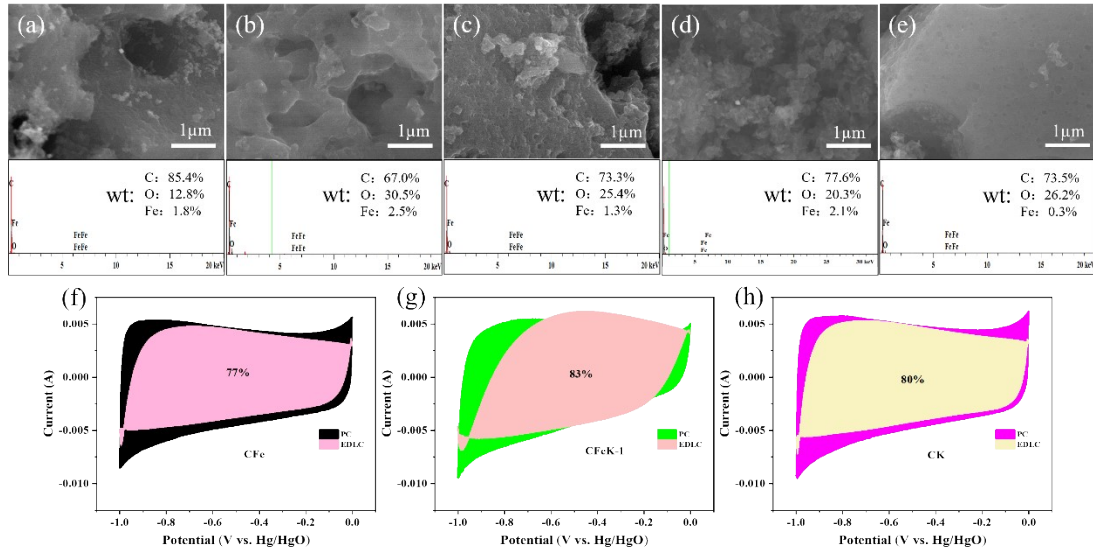

**Fig. S1.** SEM images and EDS results, (a) CFe, (b) CFeK-1.5, (c) CFeK-1, (d) CFeK-0.5, (e) CK, and pseudocapacitive contribution, (f) CFe, (g) CFeK-1, (h) CK.

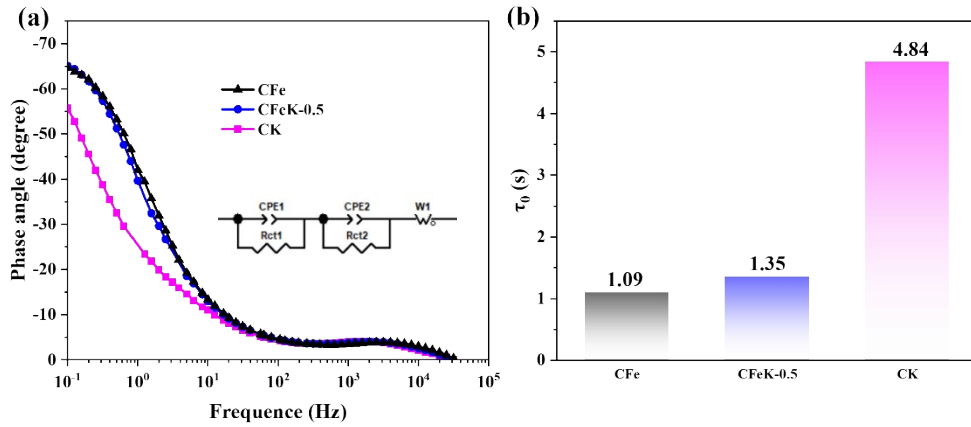

**Fig. S2.** (a) Bode plots of phase angle versus frequency, (b) Relaxation time ( $\tau_0$ , s) of porous carbons.

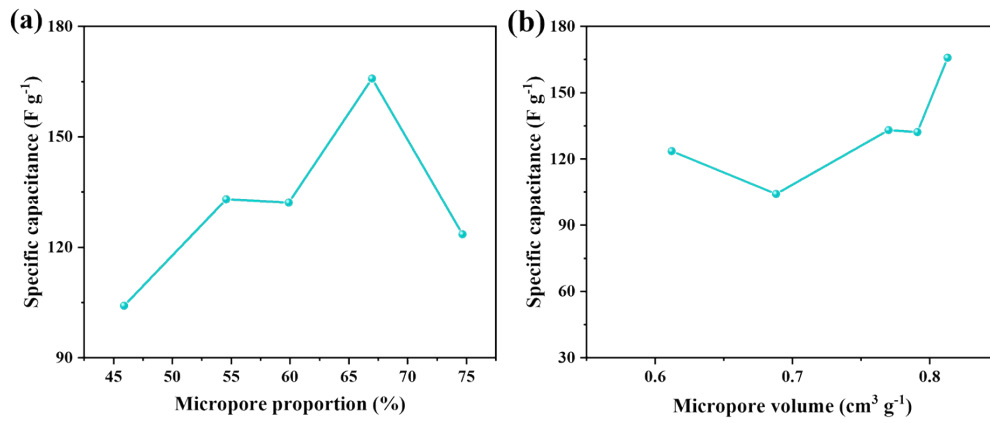

**Fig. S3.** The effect of (a) micropore proportion and (b) micropore volume on the electrochemical performance.

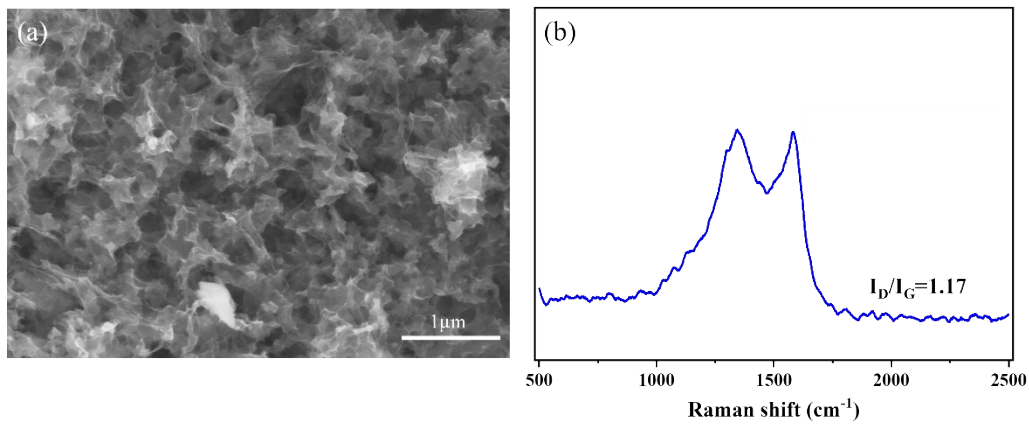

**Fig. S4.** (a) SEM image and (b) Raman spectra of CFeK-0.5 after cycling.

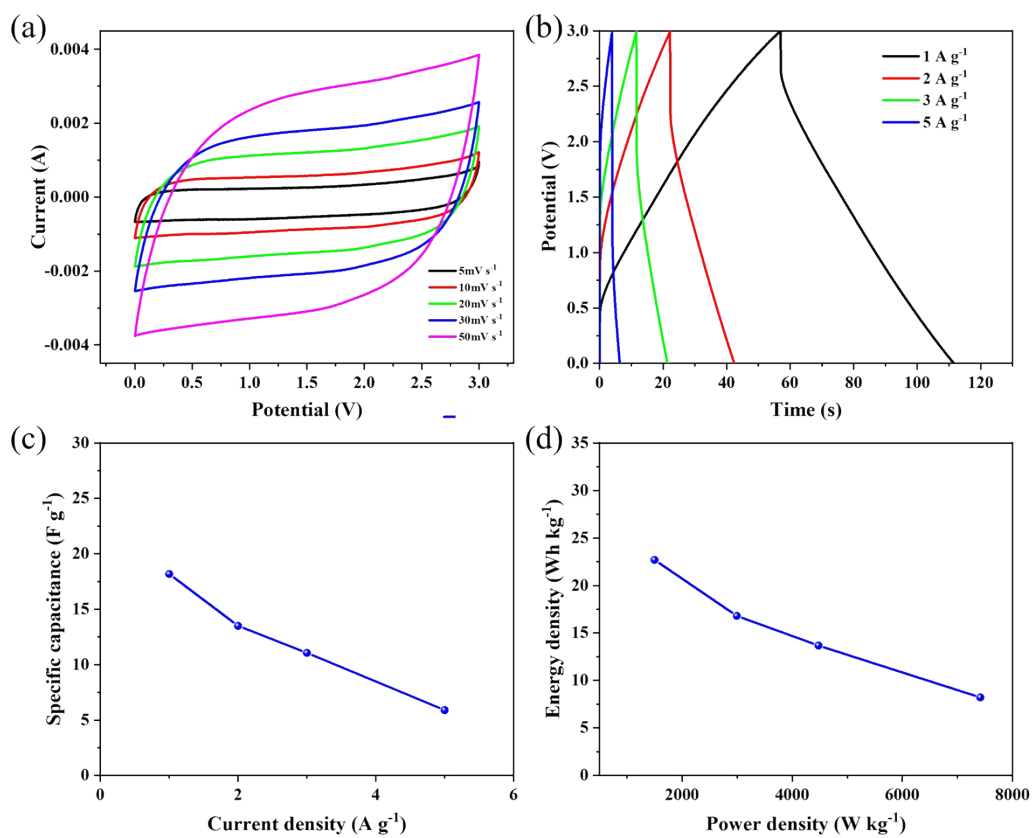

**Fig. S5.** Electrochemical performance of CFeK-0.5-based symmetric supercapacitors in EMIMBF<sub>4</sub>. (a) CV curves, (b) GCD curves, (c) specific capacitance at different current densities, (d) Ragone plots.
